# Supplementary material
Source: PubMed Central journal article supplement (PMC4618273)
Supplement: NIHMS676036-supplement-supplement_1.pdf [file NIHMS676036-supplement-supplement_1.pdf]

## SUPPLEMENTAL MATERIALS

### FIGURES

**Figure S1.** Direct comparison of mass cytometry and flow cytometry gating strategies to identify human B cell subsets

**Figure S2.** Comparable cell surface expression of markers included in mass cytometry antibody panel on PBMCs with and without liberase treatment

**Figure S3.** Identification and functional characterization of ASCs and other B cell subsets in the intestine and blood

**Figure S4.** Purity of FACS-sorted intestinal ASCs and MBCs used for Elispot and qRT-PCR

**Figure S5.** Expression of B cell lineage markers in intestinal and peripheral blood B cells used for clustering analysis by SPADE

**Figure S6.** PCA reveals conserved relationships between B cell subsets and consistent VP6-binding reactivity among different donors analyzed

**Figure S7.** Validation of mass cytometry identification of VP6-specific human B cells

### TABLES

**Table S1.** Mass cytometry antibody panel for B cell phenotyping

**Table S2.** Purity of FACS-sorted intestinal ASCs and MBCs used for Elispot and qRT-PCR

**Table S3.** V gene segment usage among VP6-specific intestinal ASCs isolated using DLP-Cy5

### MOVIES

**Movie S1.** 3D PCA PyMOL visualization of the continuum of B cell differentiation in the (A) intestine and (B) the blood

## Figure S1

A

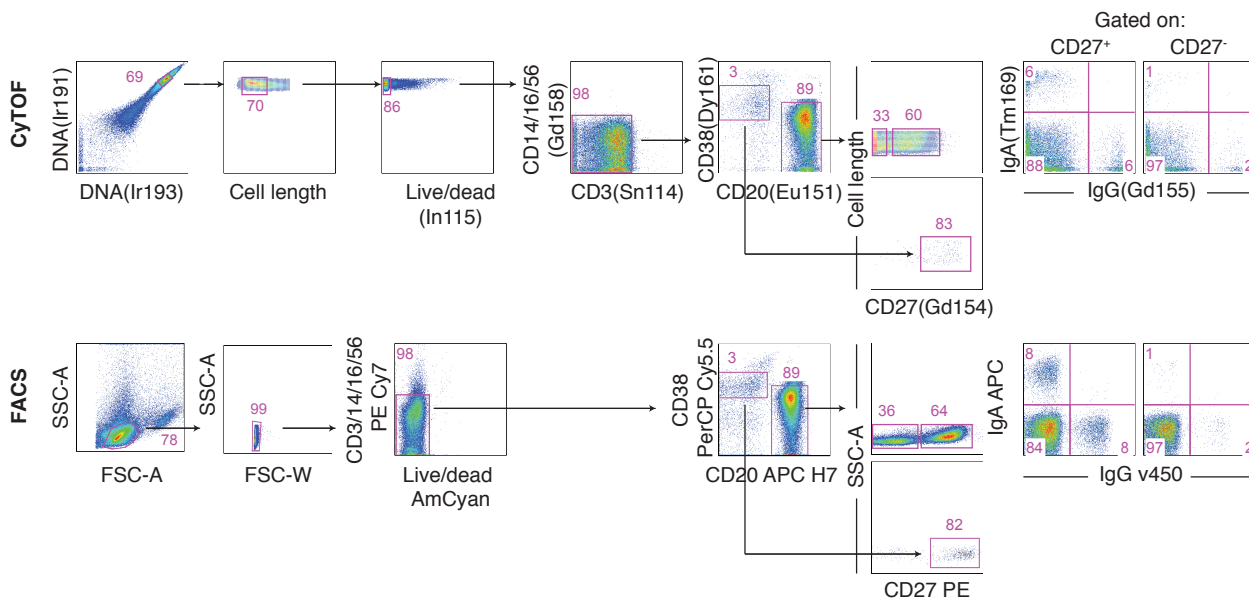

B

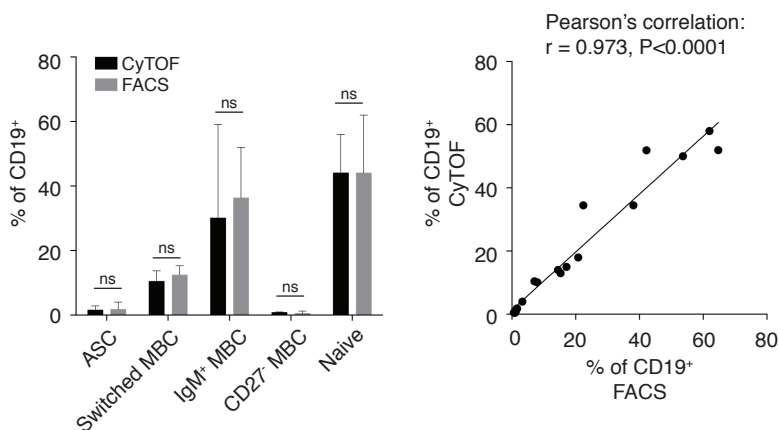

**Figure S1. Direct comparison of mass cytometry and flow cytometry gating strategies to identify human B cell subsets.** (A) Three million enriched peripheral blood B cells from the same donor were stained in parallel with metal-tagged (Table S1) or fluorescently labeled antibody panels for analysis by mass cytometry or flow cytometry, respectively. Shown are representative 2D mass cytometry and flow cytometry dot plots (100,000 events acquired per sample) from a single donor depicting the gating strategy used and the frequencies of subsets as determined by CyTOF and FACS. (B) Bar graphs (left) represent the median frequencies  $\pm$  range of ASCs, switched MBCs, IgM<sup>+</sup> MBCs, CD27<sup>-</sup> MBCs, and naive B cells among CD19<sup>+</sup> cells as determined by mass cytometry or flow cytometry (four donors). ns,  $P > 0.5$ ; unpaired t-test. Correlation (right) between frequencies of B cell subsets as determined by mass cytometry versus flow cytometry. Pearson's correlation coefficient is displayed.

## Figure S2

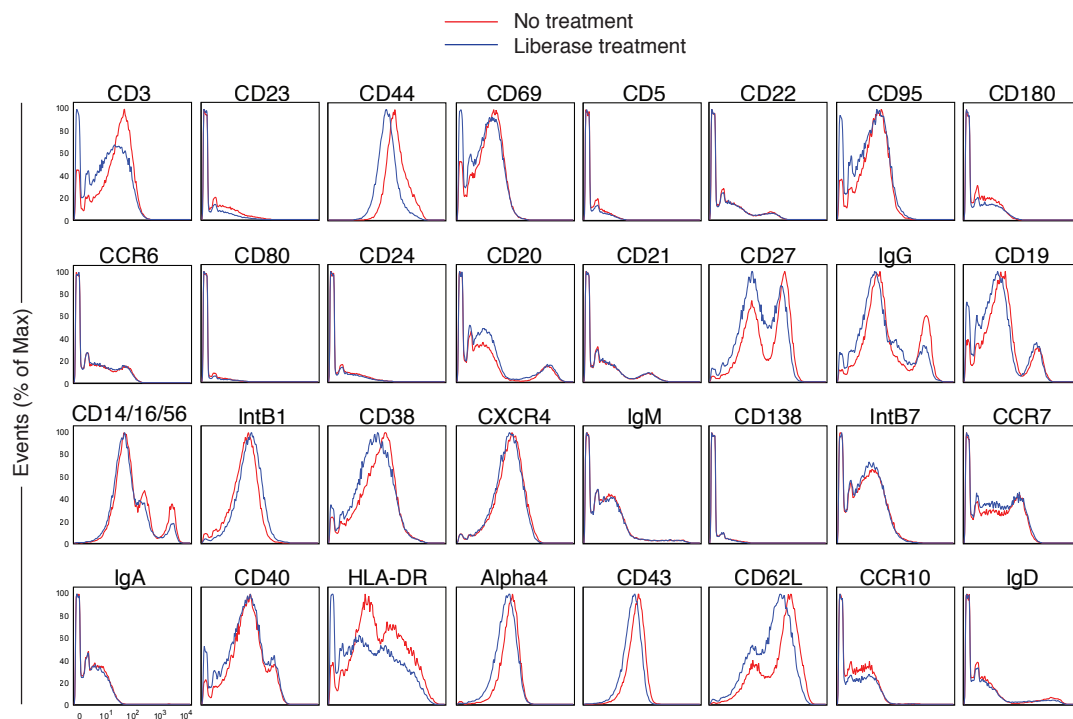

**Figure S2. Comparable cell surface expression of markers included in mass cytometry antibody panel on PBMCs with and without liberase treatment.** Five million peripheral blood mononuclear cells from a healthy donor were enzymatically treated with liberase for 1 hr at 37 °C. Cells were washed with complete RPMI and rested for 2 h at 37 °C and 5% CO<sub>2</sub> prior to mass cytometry staining with the metal-tagged antibody panel listed in Table S1. Shown are mass cytometry histogram overlays of the expression of each cell surface marker on total PBMCs with and without liberase treatment. At least 100, 000 events were acquired per sample.

## Figure S3

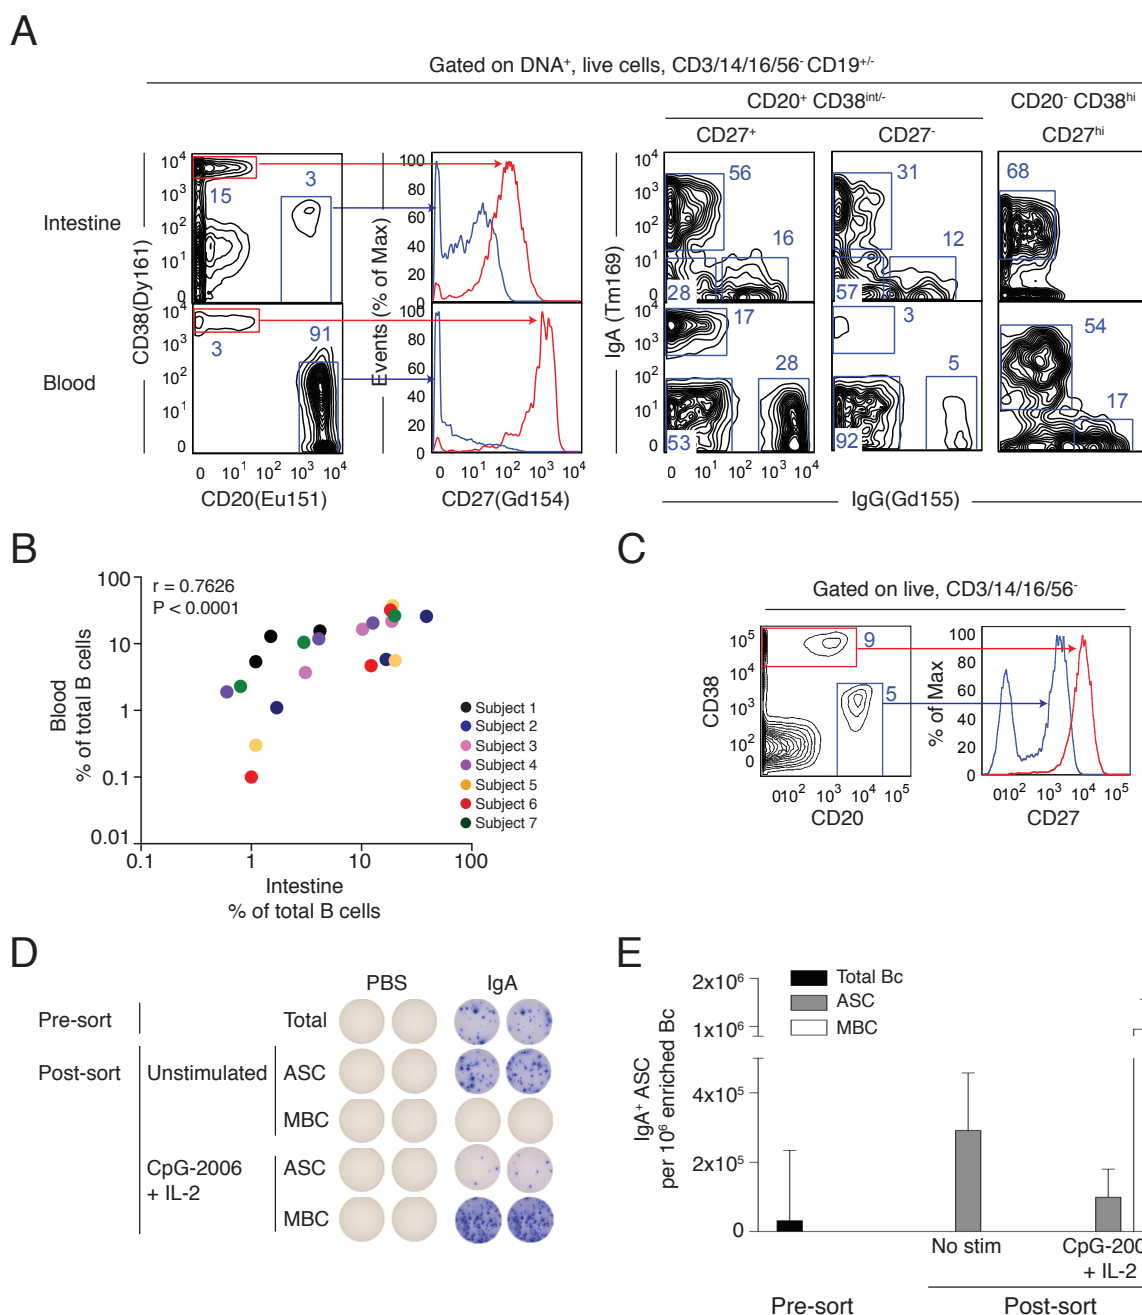

**Figure S3. Identification and functional characterization of ASCs and non-ASCs in the intestine and blood.** (A) Representative 2D mass cytometry plots showing the gating strategy used to identify ASCs (CD20<sup>lo/-</sup>CD27<sup>hi</sup>CD38<sup>hi</sup>), switched MBCs (CD20<sup>+</sup>CD27<sup>+</sup>CD38<sup>int/-</sup>IgG/IgA<sup>+</sup>), CD27<sup>-</sup> MBCs (CD20<sup>+</sup>CD27<sup>-</sup>CD38<sup>int/-</sup>IgG/IgA<sup>+</sup>), IgM<sup>+</sup> MBCs (CD20<sup>+</sup>CD27<sup>+</sup>CD38<sup>int/-</sup>IgG/IgA<sup>-</sup>) and naive B cells (CD20<sup>+</sup>CD27<sup>-</sup>CD38<sup>int/-</sup>IgG/IgA<sup>-</sup>) (B) Correlation of the frequency of switched MBCs, IgM<sup>+</sup> MBCs and CD27<sup>-</sup> MBCs in the intestine and the blood of the same donors. Dots represent MBC subsets. Colors represent each donor analyzed. Spearman's correlation coefficient is shown. (C) Intestinal ASCs and MBCs were sorted for analysis by Elispot. Shown are representative flow cytometry plots from a single donor. (D) The frequency of IgA<sup>+</sup> ASCs among sorted total intestinal ASCs and MBCs was determined by Elispot. Sorted ASCs and MBCs were stimulated for 5 days with CpG-2006 and IL-6 *in vitro* and the frequency of IgA<sup>+</sup> ASC was determined post stimulation. Shown is a representative Elispot detection of total IgA<sup>+</sup> ASCs among pre-sorted intestinal B cells or sorted intestinal ASCs and MBCs. (E) Bar graph of the median frequencies  $\pm$  range of total IgA<sup>+</sup> ASCs in enriched intestinal B cells prior to and following sorting, with or without polyclonal stimulation, in three donors.

# Figure S4

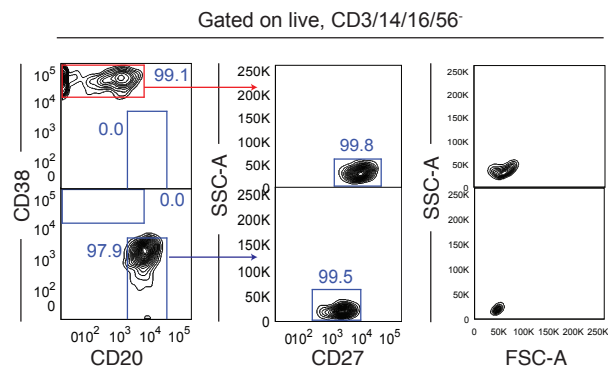

**Figure S4. Purity of FACS-sorted intestinal ASCs and MBCs used for Elispot and qRT-PCR.** Shown are 2D contour plots from a representative donor demonstrating the purity (>97%) of FACS-sorted intestinal ASCs (CD20<sup>lo/-</sup> CD27<sup>hi</sup> CD38<sup>hi</sup> (large FSC x SSC)) and MBCs (CD20<sup>+</sup> CD27<sup>+</sup> CD38<sup>int/-</sup> (small FSC x SSC)) used for Elispot or qRT-PCR (**Table S2**). At least 1000 events were acquired per sample.

## Figure S5

A

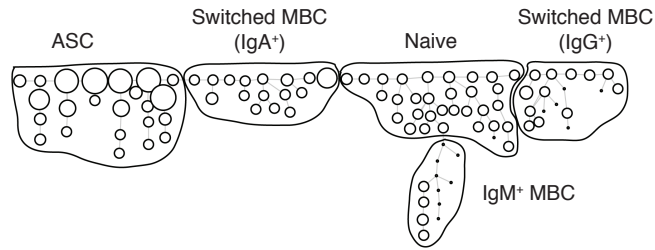

B

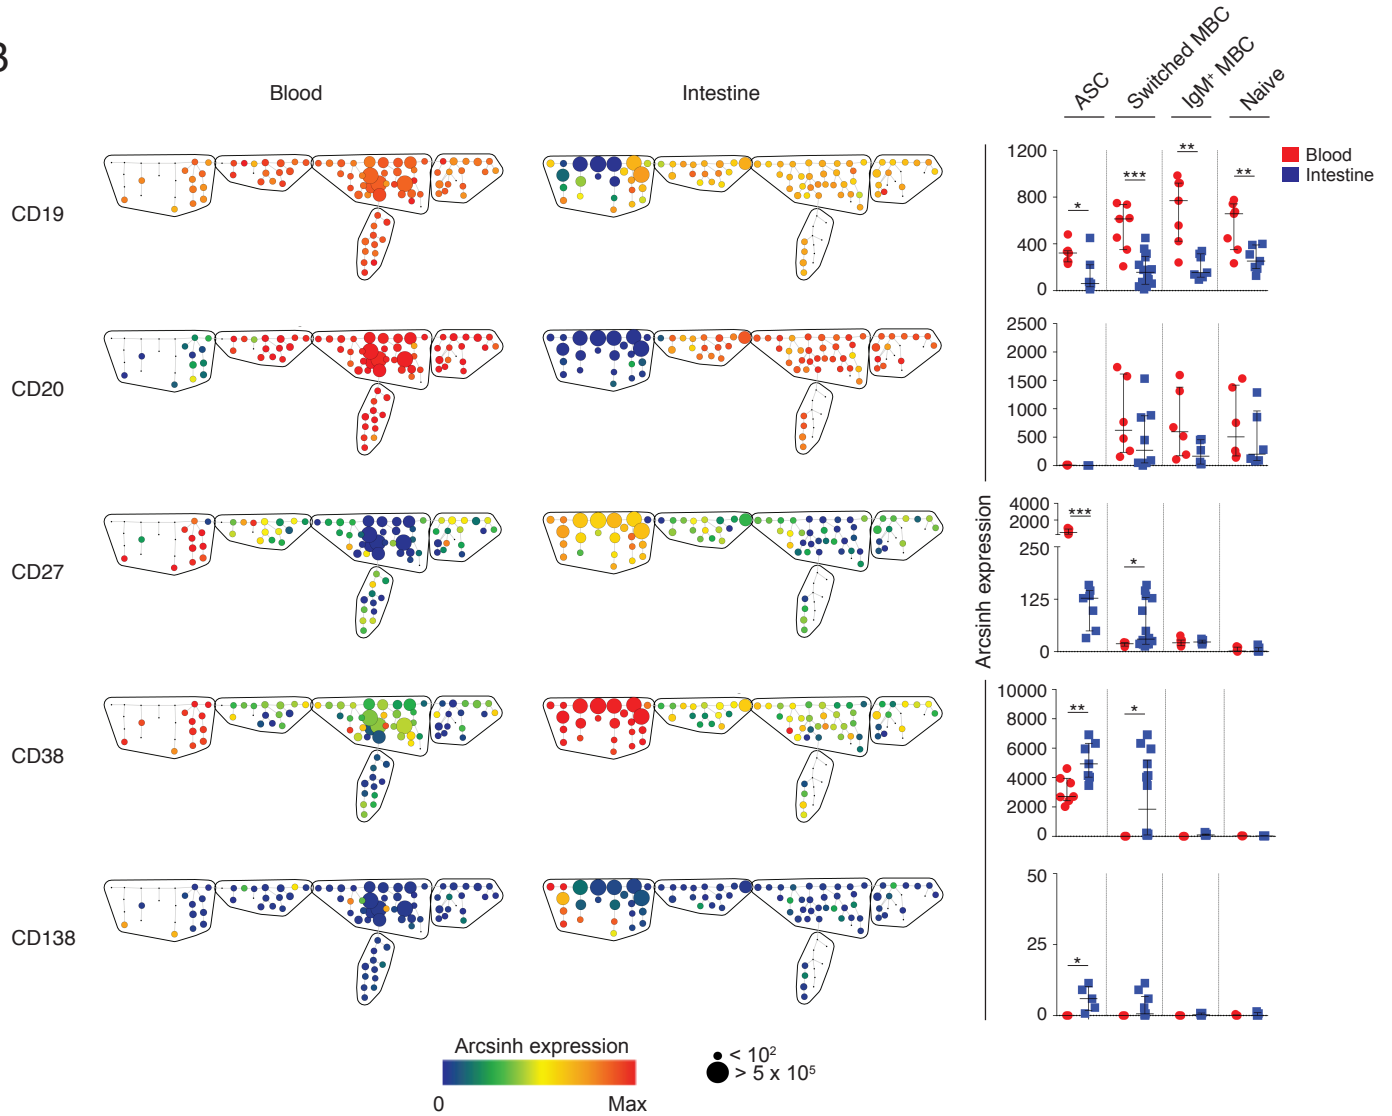

## Figure S5 (cont)

A

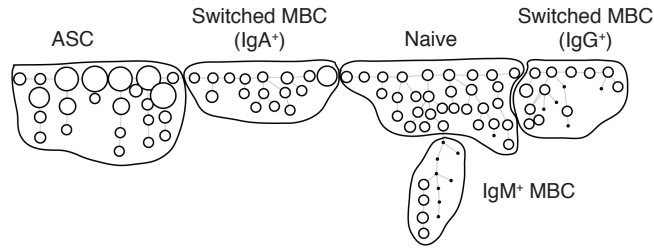

B

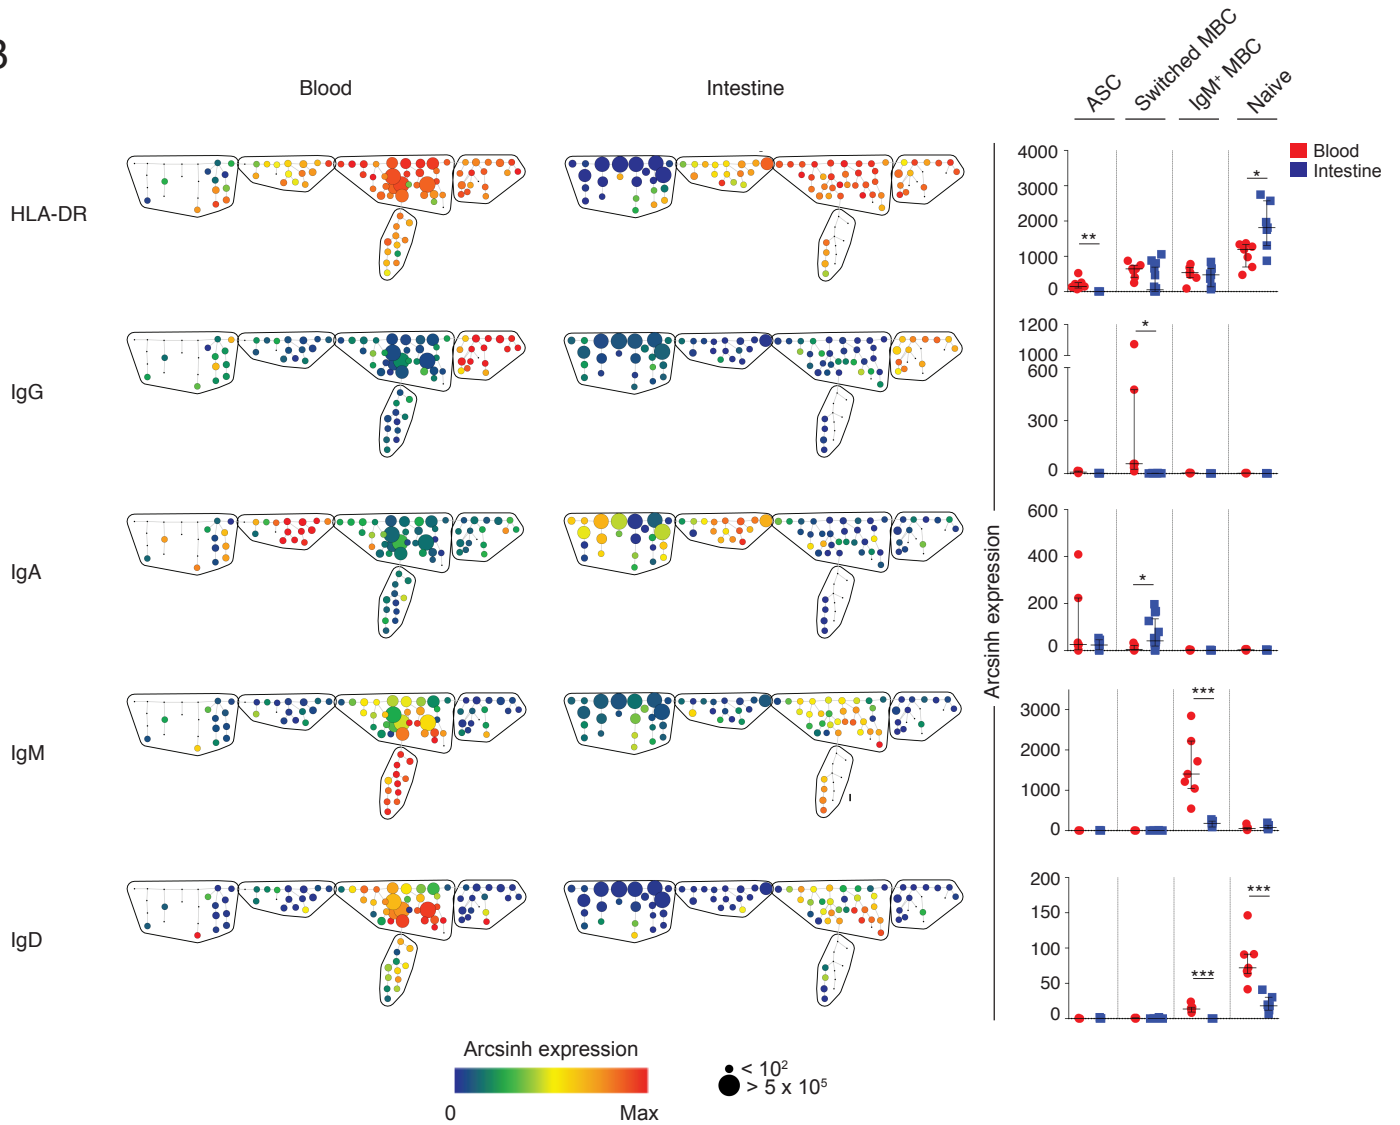

**Figure S5. Expression of B cell lineage markers in intestinal and peripheral blood B cells used for clustering analysis by SPADE. (A)** Skeleton structure of the SPADE tree for peripheral blood and intestinal B cells based on data from seven donors. **(B)** Representative SPADE tree from a single donor depicting the expression of all lineage markers in the blood and intestine. Node color represents arcsinh expression of marker indicated to the left of the tree according to the 5-point color scale below the tree, and size represents frequency as indicated in the scale. Dot plots (right) represent the median arcsinh expression  $\pm$  range of each marker across B cell subsets in the peripheral blood and intestine of seven donors. \*,  $P < 0.05$ ; \*\*,  $P < 0.005$ ; \*\*\*,  $P < 0.0005$ ; unpaired t-test.

# Figure S6

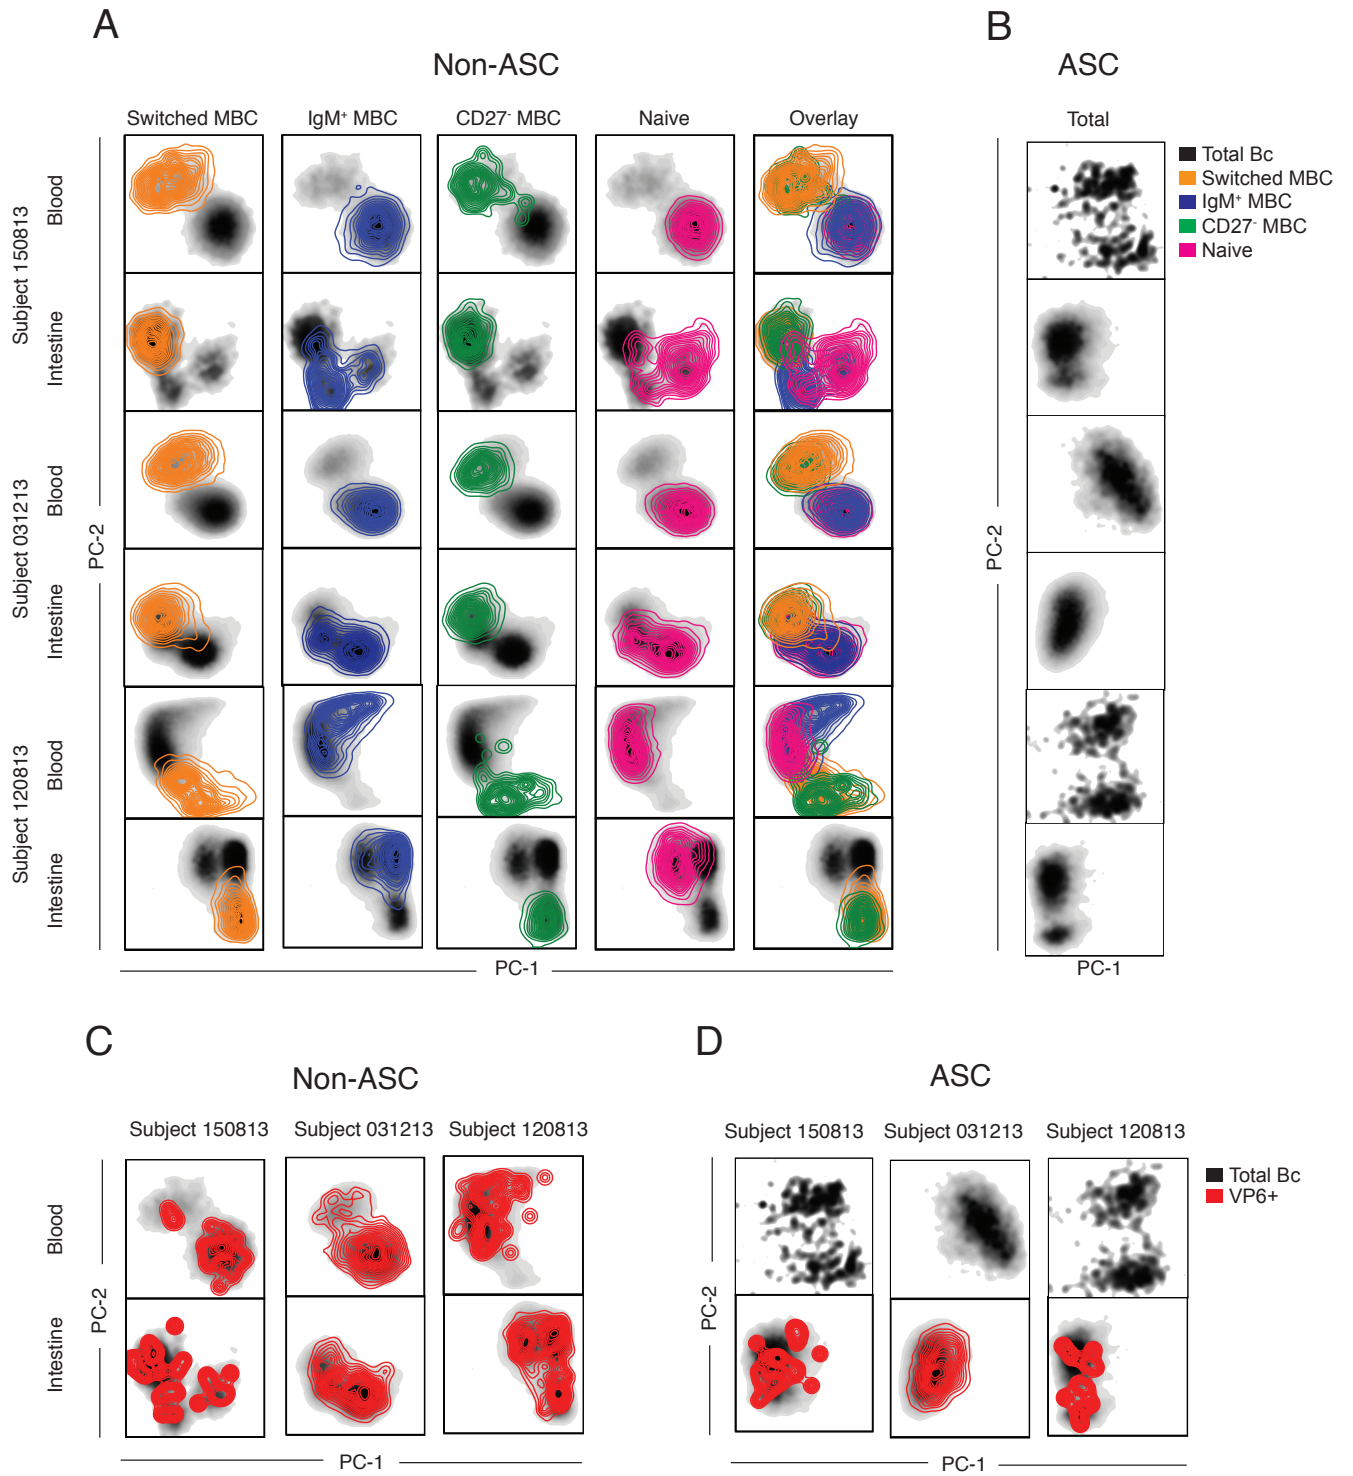



## Figure S6 (cont)

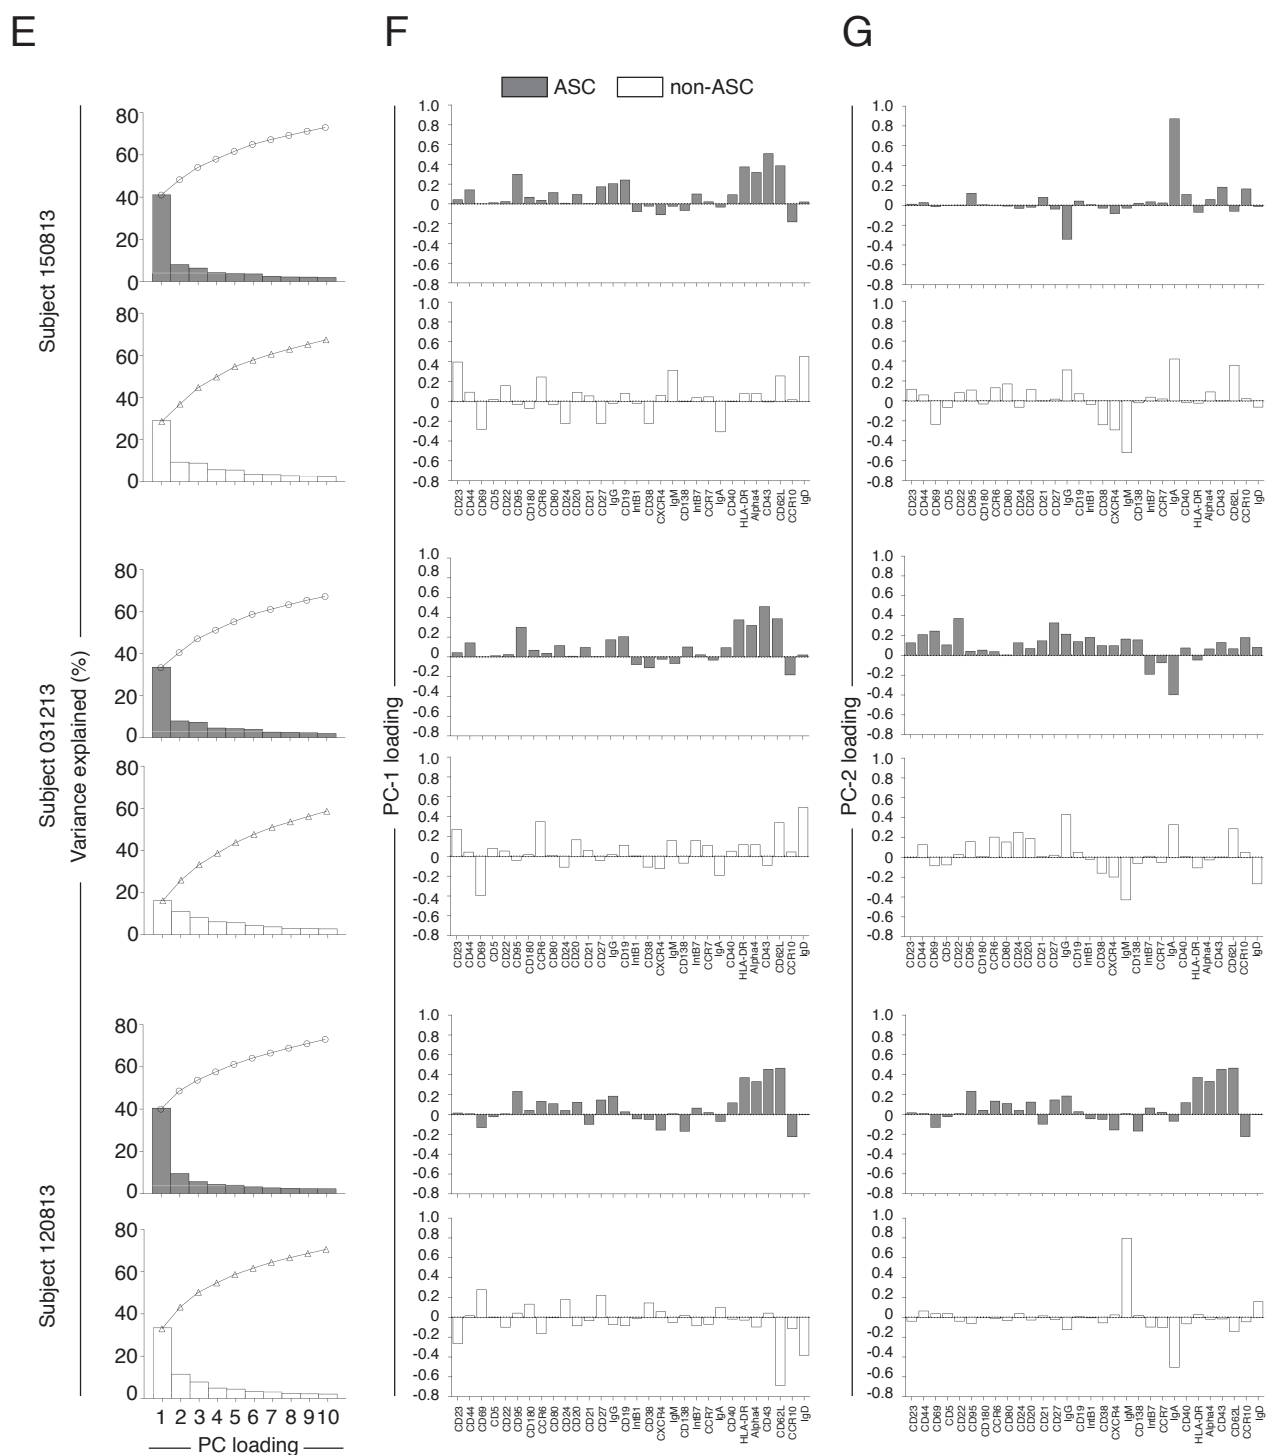

**Figure S6. PCA reveals conserved relationships between B cell subsets and consistent VP6-binding reactivity among different donors analyzed.** Colored contour density plots of the first two principal components representing classically gated (A) switched MBCs, IgM<sup>+</sup> MBCs, CD27<sup>+</sup> MBCs, naïve B cells and (B) ASCs in the blood and intestine of three donors. VP6-specific (C) Non-ASCs and (D) ASCs are represented separately as red contour density plots. (E) The percent variation explained is plotted for each component (bars) and cumulatively (line) for ASC and non-ASC for the three subjects. (F, G) Principal component loading values (weighting coefficients) for the first two components for ASC and non-ASC subsets are plotted for each parameter of the analysis.

## Figure S7

A

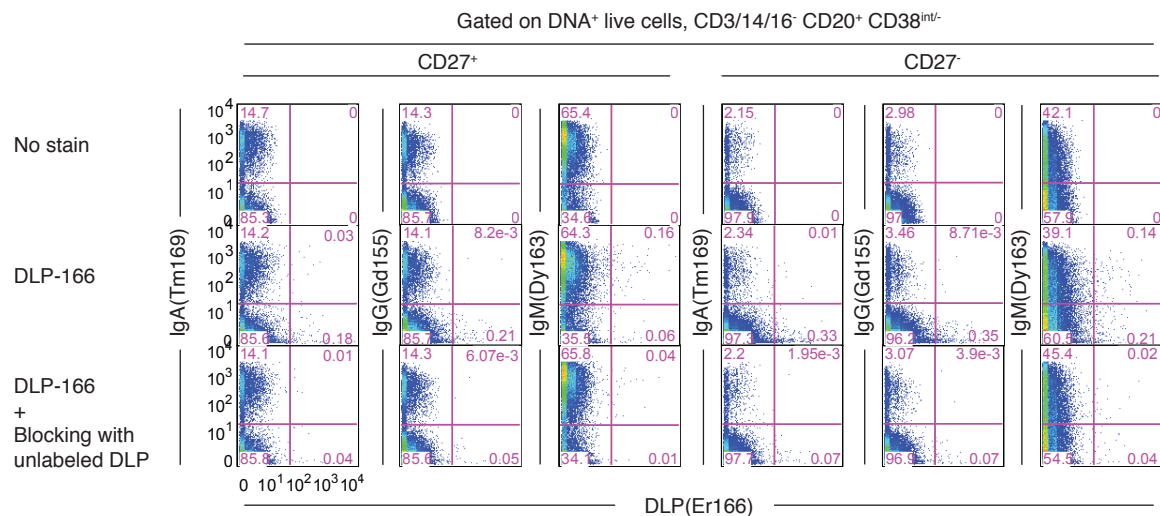

B

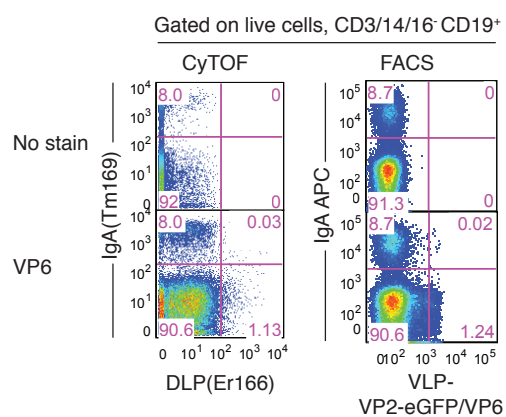

C

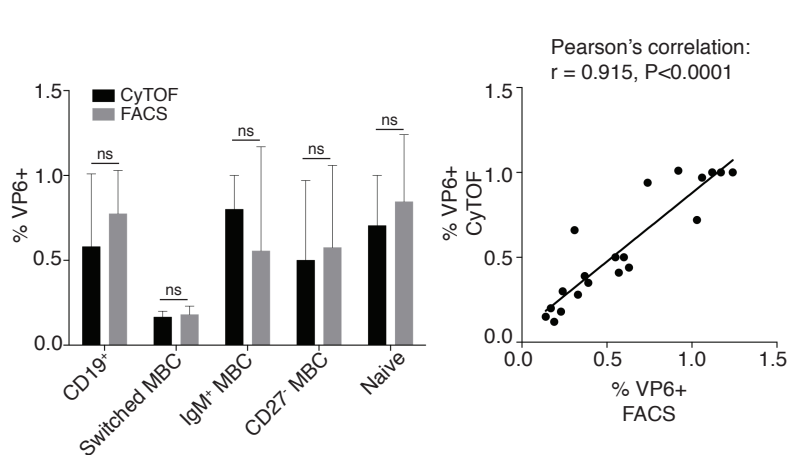

D

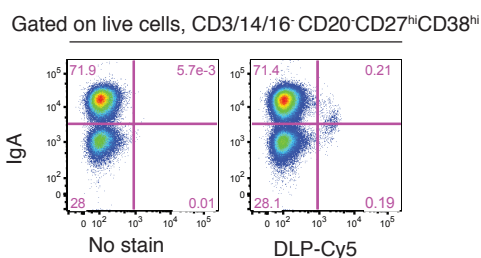

E

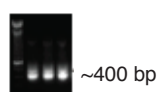

F

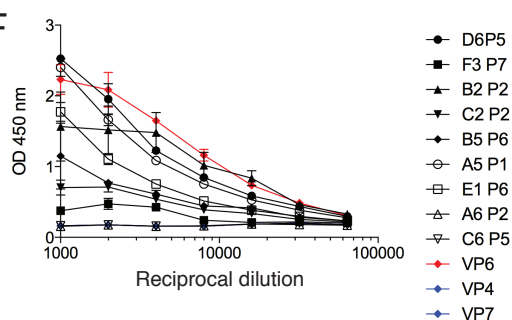

**Figure S7. Validation of mass cytometry identification of VP6-specific human B cells.** (A) Three million enriched peripheral blood B cells were stained with DLP-Er166 to identify VP6-binding B cell subsets (middle panel) by mass cytometry. Stringent gating of VP6-binding B cells was performed based on unstained controls (top panel). Specificity of VP6-specific B cell staining was demonstrated by blocking with unlabeled DLPs (bottom panel). Shown are representative 2D mass cytometry dot plots from a single donor. (B) Direct comparison of VP6-specific B cell identification by mass cytometry versus flow cytometry. Two million enriched peripheral blood B cells from the same subject were stained with either DLP-Er166 or VLPs expressing VP2-eGFP/VP6 for analysis by CyTOF or FACS, respectively. Shown are representative 2D mass cytometry and flow cytometry dot plots from a representative donor (100,000 events acquired per sample). (C) Bar graph of median frequencies  $\pm$  range of VP6-specific B cells as determined by CyTOF or FACS in samples from four donors. ns,  $P > 0.05$ ; unpaired t-test. Correlation (right) is shown between frequencies of VP6-specific B cells as determined by mass cytometry versus flow cytometry. Pearson's correlation coefficient is displayed. (D) DLP-binding intestinal IgA<sup>+</sup> ASC from gastric bypass patients were single-cell sorted into RNA lysis buffer and (E) IgH and IgLk V genes were amplified by RT-PCR and cloned into IgG expression vectors to express human mAbs. (F) Shown is the Elisa binding reactivity of 9 human mAbs (black), and mouse mAbs specific to VP6 (red), VP4 and VP7 (blue) to DLPs.

**Table S1. Mass cytometry antibody panel for B cell phenotyping**

| <b>Isotope</b> | <b>Antibody</b>  | <b>Antibody Clone</b> | <b>Company</b>               |
|----------------|------------------|-----------------------|------------------------------|
| 112Cd          | CD3 qdot 655     | S4.1                  | Invitrogen                   |
| 115In          | DOTA-maleimide   |                       | Macrocyclics, Inc.           |
| 139La          | CD23             | ML233                 | BD Pharmingen                |
| 141Pr          | CD44             | BJ18                  | Biolegend                    |
| 142Nd          | CD69             | FN50                  | BD Biosciences               |
| 143Nd          | CD5              | UCH12                 | Biolegend                    |
| 144Nd          | CD22             | HIB22                 | BD Biosciences               |
| 145Nd          | CD95             | DX2                   | BD Biosciences               |
| 146Nd          | CD180            | MHR73-11              | BD Biosciences               |
| 147Sm          | CCR6             | 11A9                  | BD Biosciences               |
| 149Sm          | CD80             | L307.4                | BD Biosciences               |
| 150Sm          | CD24             | ML5                   | BD Biosciences               |
| 151Eu          | CD20             | 2H7                   | BD Biosciences               |
| 153Eu          | CD21             | 1048                  | BD Biosciences               |
| 154Gd          | CD27             | LG.7F9                | eBiosciences                 |
| 155Gd          | IgG              | G18-145               | BD Biosciences               |
| 157Gd          | CD19             | H1B19                 | BD Biosciences               |
| 158Gd          | CD14             | M5E2                  | Biolegend                    |
| 158Gd          | CD16             | 3G8                   | BD Biosciences               |
| 158Gd          | CD56             | HCD56                 | Biolegend                    |
| 160Gd          | Integrin B1      | MAR4                  | BD Biosciences               |
| 161Dy          | CD38             | HIT2                  | Biolegend                    |
| 162Dy          | CXCR4            | 12G5                  | Biolegend                    |
| 163Dy          | IgM              | G20-127               | BD Biosciences               |
| 165Ho          | CD138            | DL-101                | BD Biosciences               |
| 166Er          | DLP (RRV strain) |                       |                              |
| 167Er          | Integrin B7      | FIB504                | Biolegend                    |
| 168Er          | CCR7             | 150503                | R&D Systems                  |
| 169Tm          | IgA              | G18-1                 | BD Biosciences               |
| 170Yb          | CD40             | 5C3                   | BD Biosciences               |
| 171Tb          | HLA-DR           | L243                  | BD Biosciences               |
| 172Yb          | Alpha 4          | 9F10                  | Biolegend                    |
| 173Yb          | CD43             | 84-3C1                | eBioscience                  |
| 174Yb          | CD62L            | DREG-56               | BD Biosciences               |
| 175Lu          | CCR10            | 1B5                   | Millenium<br>Pharmaceuticals |
| 176Yb          | IgD              | IA6-2                 | BD Biosciences               |

**Table S2. Purity of FACS-sorted intestinal ASCs and MBCs used for Elispot and qRT-PCR.**

Intestinal ASCs and MBCs were sorted based on CD3/14/16/56<sup>-</sup> CD20<sup>lo/-</sup>CD27<sup>hi</sup>CD38<sup>hi</sup> and CD3/14/16/56<sup>-</sup>CD20<sup>+</sup>CD27<sup>+</sup>CD38<sup>int/-</sup> phenotypes, respectively (**Fig. S3**). Shown is the median purity and range of sorted intestinal ASCs and MBCs from three donors used for Elispot or qRT-PCR. At least 1000 events were acquired per sample.

| Sorted subset  | Analysis | Median purity (range) (%) | N |
|----------------|----------|---------------------------|---|
| Intestinal ASC | Elispot  | >99.9 (96.9 - >99.9)      | 3 |
|                | qRT-PCR  | 99.0 (99.0 - >99.9)       | 3 |
| Intestinal MBC | Elispot  | 98.0 (97.6 - 99.5)        | 3 |
|                | qRT-PCR  | 98.0 (96.0 - 99.1)        | 3 |

**Table S3. V gene segment usage among VP6-specific intestinal ASCs isolated using DLP-Cy5**

| <b>mAb</b> | <b>Donor</b> | <b>VH</b> | <b>JH</b> | <b>DH</b> | <b>VK</b> | <b>JK</b> |
|------------|--------------|-----------|-----------|-----------|-----------|-----------|
| A5         | 1            | 4-4       | 6         | 2-21      | 3-20      | 4         |
| B2         | 1            | 4-4       | 6         | 3-3       | 1-9       | 5         |
| C3         | 1            | 4-4       | 3         | 3-3       | 1-9       | 5         |
| D6         | 1            | 4-39      | 2         | 3-22      | 3-20      | 4         |
| B5         | 1            | 4-4       | 6         | 3-3       | 1-9       | 2         |
| E1         | 1            | 4-4       | 6         | 2-21      | 3-20      | 3         |
| F3         | 1            | 4-4       | 4         | 3-22      | 1-39      | 2         |

**Movie S1. 3D PCA PyMOL visualization of the continuum of B cell differentiation in the intestine and the blood**

Each dot represents a single cell and is plotted in 3D according to the first three principal components. The color of the dot represents a specific B cell subset: switched MBCs (orange), IgM+ MBCs (blue), CD27- MBCs (green) and naïve B cells (pink) from the (**A**) blood and (**B**) intestine of the donor represented in Fig. 5.
